# Supplementary material for: Open-label extension of a randomized trial investigating safety and efficacy of rhPTH(1–84) in hypoparathyroidism
Source: PubMed Central journal article supplement (PMC11090130; doi:10.1093/jbmrpl/ziad010), 2024-01-05
Supplement: study_404_supplemental_materials_revised_clean_ziad010.pdf [file study_404_supplemental_materials_revised_clean_ziad010.pdf]

**Supplementary Table 1.** Full Inclusion and Exclusion Criteria

|                                                                                                                                                                                                                                                                                                                                                                                                                                                                                                                                                                                                                                                                                                                                                                                                                                                                                                                                                                                                                                                                                                                                                                                        |
|----------------------------------------------------------------------------------------------------------------------------------------------------------------------------------------------------------------------------------------------------------------------------------------------------------------------------------------------------------------------------------------------------------------------------------------------------------------------------------------------------------------------------------------------------------------------------------------------------------------------------------------------------------------------------------------------------------------------------------------------------------------------------------------------------------------------------------------------------------------------------------------------------------------------------------------------------------------------------------------------------------------------------------------------------------------------------------------------------------------------------------------------------------------------------------------|
| Inclusion criteria                                                                                                                                                                                                                                                                                                                                                                                                                                                                                                                                                                                                                                                                                                                                                                                                                                                                                                                                                                                                                                                                                                                                                                     |
| <ul style="list-style-type: none"><li>• 18–85 years of age</li><li>• Completion of PARALLAX, including follow-up</li><li>• Willingness and ability to comply with the study procedures and restrictions and provide informed consent for participation</li><li>• Men or nonpregnant, nonlactating women who comply with contraceptive requirements or are of nonchildbearing potential</li></ul>                                                                                                                                                                                                                                                                                                                                                                                                                                                                                                                                                                                                                                                                                                                                                                                       |
| Exclusion criteria                                                                                                                                                                                                                                                                                                                                                                                                                                                                                                                                                                                                                                                                                                                                                                                                                                                                                                                                                                                                                                                                                                                                                                     |
| <ul style="list-style-type: none"><li>• Treatment with any investigational product, aside from that received during the study, within 3 months prior to the screening visit</li><li>• Treatment with PTH, PTH analog, or PTH fragment within the last 30 days from the screening visit</li><li>• Use of the following medications prior to administration of rhPTH(1–84) within: 30 days – loop diuretics, lithium, systemic corticosteroids (as judged by the investigator: primarily high doses of systemic corticosteroids were to be excluded; stable doses of hydrocortisone may have been acceptable); 3 months – cinacalcet hydrochloride; 6 months – fluoride tablets, oral bisphosphonates, methotrexate, growth hormone, digoxin; 12 months – intravenous bisphosphonates, drug or alcohol abuse</li><li>• Clinically relevant issues or risk factors contraindicating study participation<sup>a</sup></li><li>• History of clinically significant illness during the 4 weeks prior to dosing, or clinically significant procedure within 8 weeks of first dose, as determined by investigator, or expected to undergo a major surgical procedure during the study</li></ul> |

- Diseases affecting calcium metabolism of calcium-phosphorus homeostasis other than HypoPT
- History of PTH intolerance, allergic response to PTH, PTH analogs or PTH(1–34) analogs or other significant allergies contraindicating study participation

<sup>a</sup>Includes patients who were at increased baseline risk for osteosarcoma, such as patients with Paget's disease of bone or unexplained elevations of alkaline phosphatase, young adult patients with open epiphyses, patients with hereditary disorders predisposing to osteosarcoma or patients with a prior history of external beam or implant radiation therapy involving the skeleton.

HypoPT = hypoparathyroidism; PTH = parathyroid hormone; rhPTH(1–84) = recombinant human parathyroid hormone (1–84).

**Supplementary Table 2.** *Post hoc* analyses mixed effects models of the difference from baseline in biomarkers (Fig 2), bone turnover markers (Fig 3), and HRQoL parameters (Fig 4)

| Figure | Parameter                                          | Overall <i>P</i> (ProbF) | Timepoint   | Estimated difference from baseline | <i>P</i> | Lower limit | Upper limit |
|--------|----------------------------------------------------|--------------------------|-------------|------------------------------------|----------|-------------|-------------|
| Fig 2A | Albumin-corrected serum calcium                    | 0.0001                   | Week 4      | 0.04080                            | 0.2756   | -0.03290    | 0.1145      |
|        |                                                    |                          | Week 8      | 0.07223                            | 0.0547   | -0.00147    | 0.1459      |
|        |                                                    |                          | Week 16     | 0.05270                            | 0.1596   | -0.02100    | 0.1264      |
|        |                                                    |                          | Week 24     | -0.02492                           | 0.5049   | -0.09862    | 0.04879     |
|        |                                                    |                          | Week 32     | -0.08182                           | 0.0321   | -0.1566     | -0.00708    |
|        |                                                    |                          | Week 40     | -0.00545                           | 0.8909   | -0.08389    | 0.07298     |
|        |                                                    |                          | Week 52/EOT | -0.07636                           | 0.0395   | -0.1490     | -0.00371    |
| Fig 2B | Serum phosphorus                                   | 0.0172                   | Week 4      | -0.1629                            | 0.0004   | -0.2510     | -0.07483    |
|        |                                                    |                          | Week 8      | -0.1201                            | 0.0079   | -0.2081     | -0.03198    |
|        |                                                    |                          | Week 16     | -0.1029                            | 0.0224   | -0.1910     | -0.01483    |
|        |                                                    |                          | Week 24     | -0.1562                            | 0.0006   | -0.2443     | -0.06817    |
|        |                                                    |                          | Week 32     | -0.08875                           | 0.0516   | -0.1781     | 0.000609    |
|        |                                                    |                          | Week 40     | -0.1059                            | 0.0272   | -0.1998     | -0.01208    |
|        |                                                    |                          | Week 52/EOT | -0.1136                            | 0.0106   | -0.2003     | -0.02695    |
| Fig 2C | Albumin-corrected serum calcium-phosphorus product | 0.0021                   | Week 4      | -0.3017                            | 0.0015   | -0.4862     | -0.1172     |
|        |                                                    |                          | Week 8      | -0.1784                            | 0.0580   | -0.3630     | 0.006114    |
|        |                                                    |                          | Week 16     | -0.1543                            | 0.1006   | -0.3388     | 0.03025     |
|        |                                                    |                          | Week 24     | -0.3759                            | <.0001   | -0.5604     | -0.1913     |
|        |                                                    |                          | Week 32     | -0.2939                            | 0.0023   | -0.4811     | -0.1067     |
|        |                                                    |                          | Week 40     | -0.2391                            | 0.0175   | -0.4357     | -0.04245    |
|        |                                                    |                          | Week 52/EOT | -0.3372                            | 0.0003   | -0.5188     | -0.1555     |
| Fig 2D | Urinary calcium excretion                          | 0.0001                   | Week 16     | -0.3446                            | 0.6731   | -1.9711     | 1.2820      |
|        |                                                    |                          | Week 32     | -3.3037                            | 0.0002   | -4.9553     | -1.6521     |
|        |                                                    |                          | Week 52/EOT | -2.6960                            | 0.0018   | -4.3476     | -1.0444     |

| Figure | Parameter        | Overall <i>P</i> (ProbF) | Timepoint   | Estimated difference from baseline | <i>P</i> | Lower limit | Upper limit |
|--------|------------------|--------------------------|-------------|------------------------------------|----------|-------------|-------------|
| Fig 3A | BAP              | <.0001                   | Week 24     | 15.6520                            | <.0001   | 10.6391     | 20.6649     |
|        |                  |                          | Week 52/EOT | 16.4636                            | <.0001   | 11.5305     | 21.3968     |
| Fig 3B | Osteocalcin      | <.0001                   | Week 24     | 33.9526                            | <.0001   | 21.6909     | 46.2144     |
|        |                  |                          | Week 52/EOT | 44.9273                            | <.0001   | 32.8512     | 57.0034     |
| Fig 3C | PINP             | <.0001                   | Week 24     | 139.74                             | <.0001   | 91.2803     | 188.20      |
|        |                  |                          | Week 52/EOT | 164.25                             | <.0001   | 116.51      | 211.99      |
| Fig 3D | CTX              | <.0001                   | Week 24     | 445.02                             | <.0001   | 305.32      | 584.71      |
|        |                  |                          | Week 52/EOT | 423.00                             | <.0001   | 285.34      | 560.66      |
| Fig 4A | Symptom subscale | 0.0281                   | Week 24     | -0.2928                            | 0.0250   | -0.5469     | -0.03870    |
|        |                  |                          | Week 52/EOT | -0.3081                            | 0.0169   | -0.5580     | -0.05821    |
| Fig 4A | Impact subscale  | 0.0009                   | Week 24     | -0.2186                            | 0.0023   | -0.3543     | -0.08291    |
|        |                  |                          | Week 52/EOT | -0.2543                            | 0.0005   | -0.3901     | -0.1186     |
| Fig 4B | EQ-5D-5L VAS     | 0.0510                   | Week 24     | 2.8848                             | 0.2937   | -2.5925     | 8.3621      |
|        |                  |                          | Week 52/EOT | 6.7273                             | 0.0156   | 1.3418      | 12.1128     |
| Fig 4C | PGI-S            | 0.2898                   | Week 24     | -0.2418                            | 0.1193   | -0.5487     | 0.06513     |
|        |                  |                          | Week 52/EOT | -0.1364                            | 0.3669   | -0.4382     | 0.1655      |

BAP = bone-specific alkaline phosphatase; CTX = type I collagen C-telopeptide; EOT = end of treatment; HRQoL= health-related quality of life; PGI-S = Patient Global Impression of Severity; PINP = procollagen type I N-terminal propeptide; VAS = visual analogue scale.

**Supplementary Fig. 1. Study design.**

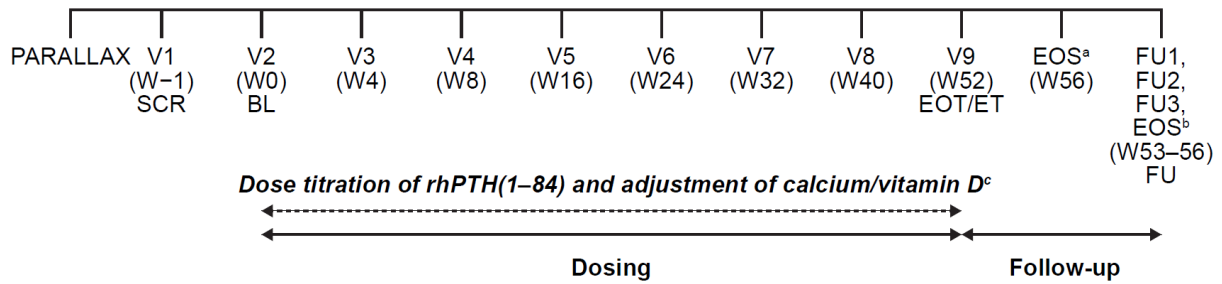

<sup>a</sup>Patients who transferred to commercial rhPTH(1-84) immediately after the EOT/ET visit (V9/W52) had an EOS (V10/W56) contact 30 days following the last dose of rhPTH(1-84). <sup>b</sup>Patients who did not continue on rhPTH(1-84) following the EOT/ET visit (V9) proceeded with weekly follow-up visits (FU1/W53, FU2/W54, and FU3/W55) with serum calcium measurements until a maximum of 30 days had elapsed. All patients had an EOS contact (V10/W56) 30 days after the final dose of study drug. Patients who transferred to commercial rhPTH(1-84) but experienced a treatment gap after the EOT/ET visit (V9/W52) proceeded with weekly follow-up visits (FU1/W53, FU2/W54, and FU3/W55) with serum calcium measurements until receiving commercial rhPTH(1-84) or until a maximum of 30 days had elapsed. All patients had an EOS contact (V10/W56) 30 days after the final dose of study drug. <sup>c</sup>Total serum calcium was measured 3-7 days after any adjustment of study drug and/or supplements. BL = baseline; EOT = end of treatment; EOS = end of study; ET = early termination; FU = follow-up; rhPTH(1-84) = recombinant human parathyroid hormone (1-84); SCR = screening; V = visit; W = week.
